# Supplementary material
Source: Springer Nature journal article supplement (https://www.springermedizin.de/resource/supplementary/12906_2010_337_MOESM2_ESM.PDF/9519466)
Supplement: MOESM2 [file 9519466]

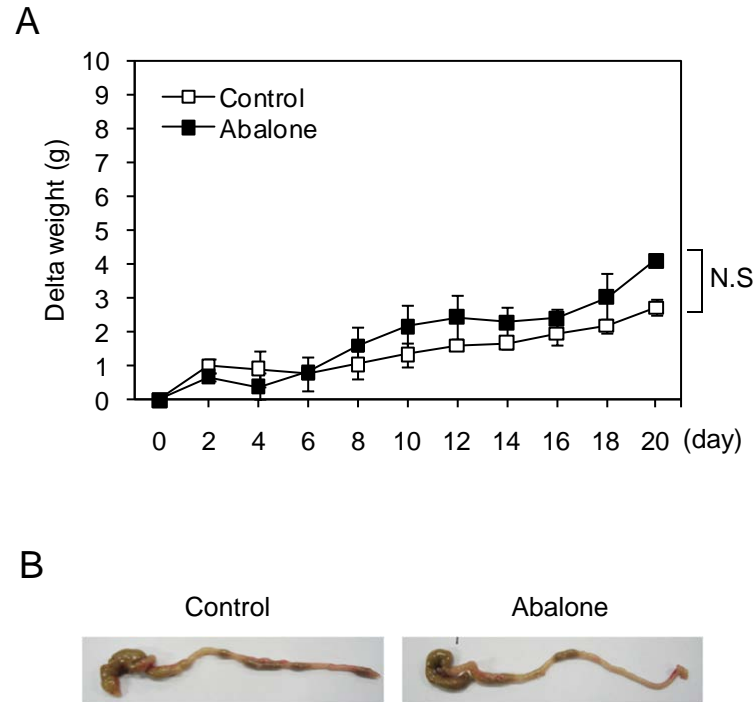

**Supplementary Fig. 2.** Toxicity test of the abalone visceral extracts upon oral administration. Mice were given 100ul of 50mg/ml of abalone visceral extracts by oral injection for 20 days. (A) Weight changes were measured every two days and shown as delta weight. N.S; statistically non-significant. (B) After 20 days from oral feeding, gross analysis of intestines from each group was performed.
